# Supplementary material
Source: Copernicus journal article supplement (doi:10.5194/egusphere-2026-2515)
Supplement: Supplementary file 1 [file egusphere-2026-2515-supplement.pdf]

## Supplementary Figures

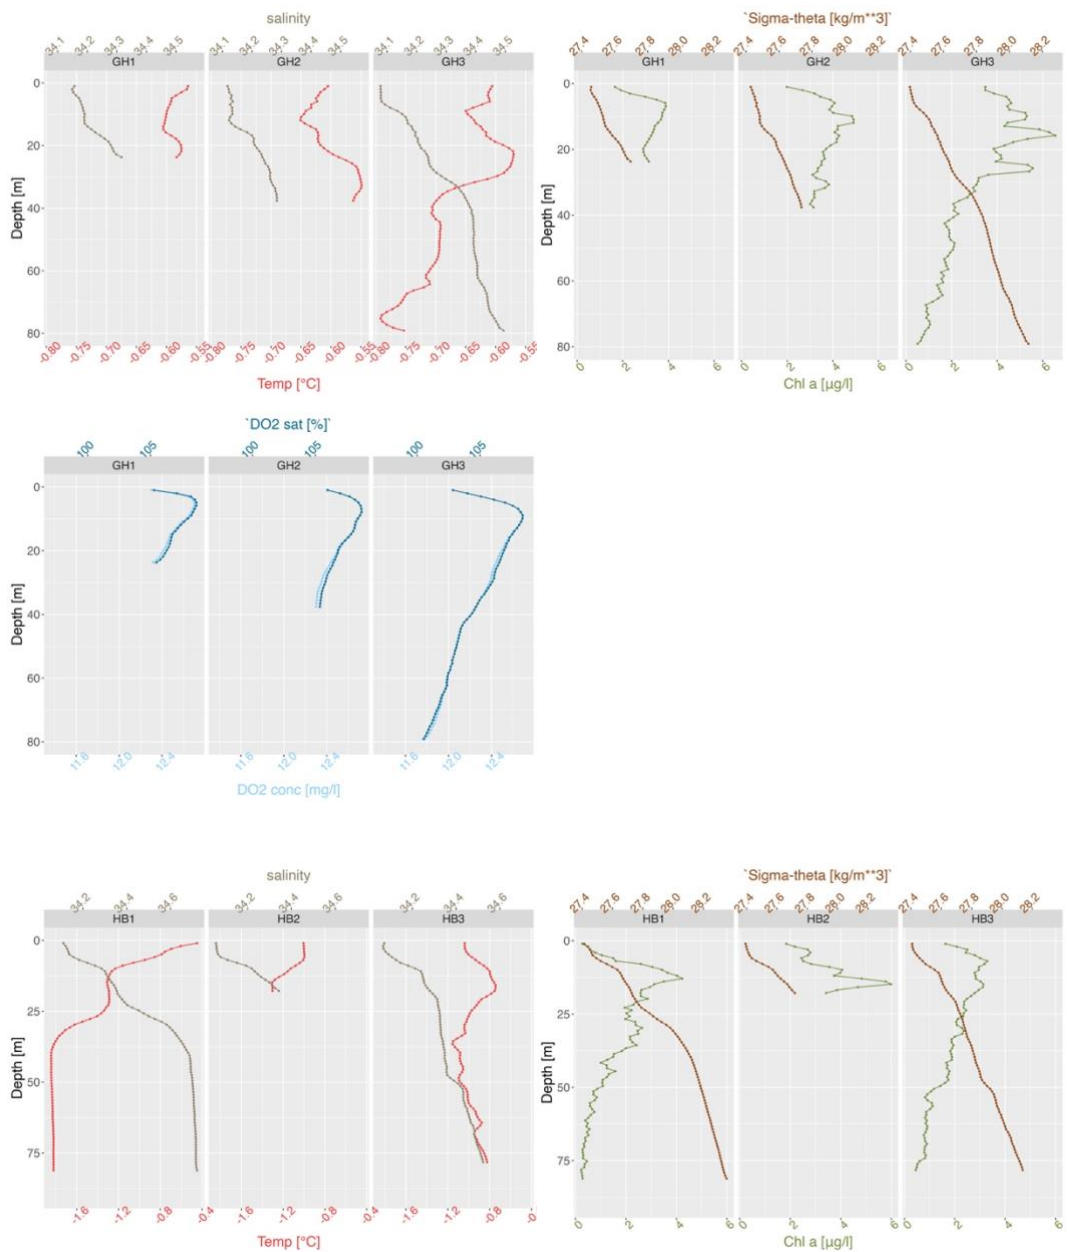

5

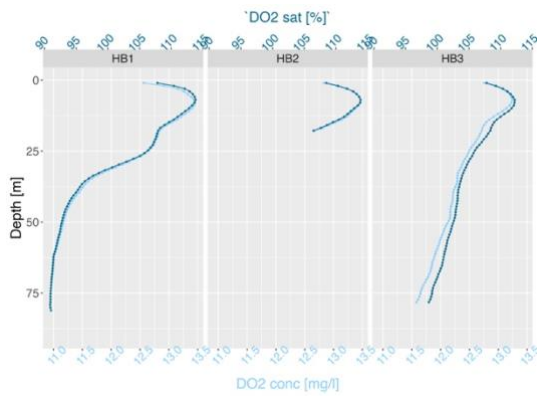

Fig. S1. Vertical profiles of temperature, salinity, density, chlorophyll concentrations, oxygen concentration & saturation, and two types of particle fluxes at stations in Gåshamna (GH) and near Hanbreen (HB) in May 2023.

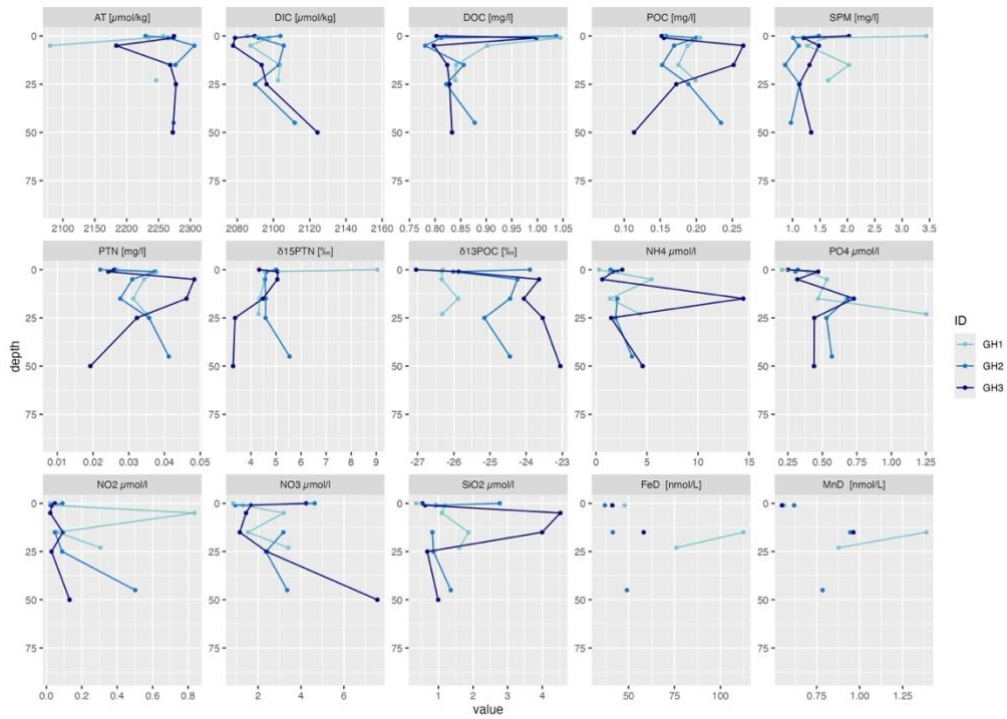

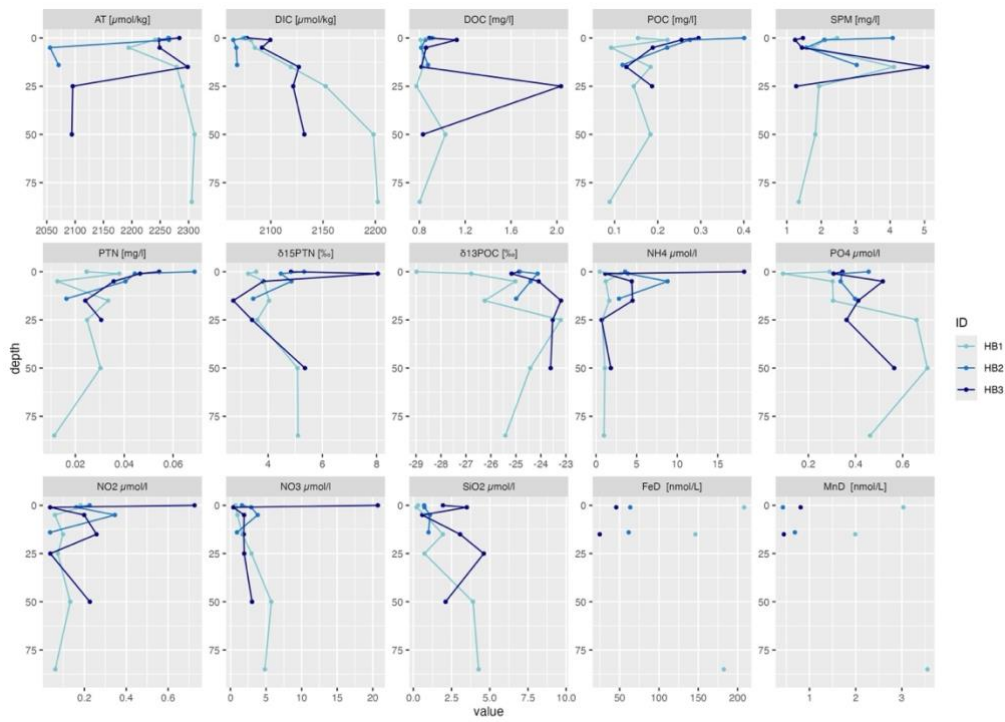

10

Fig. S2. Vertical profiles of biogeochemical properties in Goshamna (GH) and near Hanbreen (HB) in May 2023.

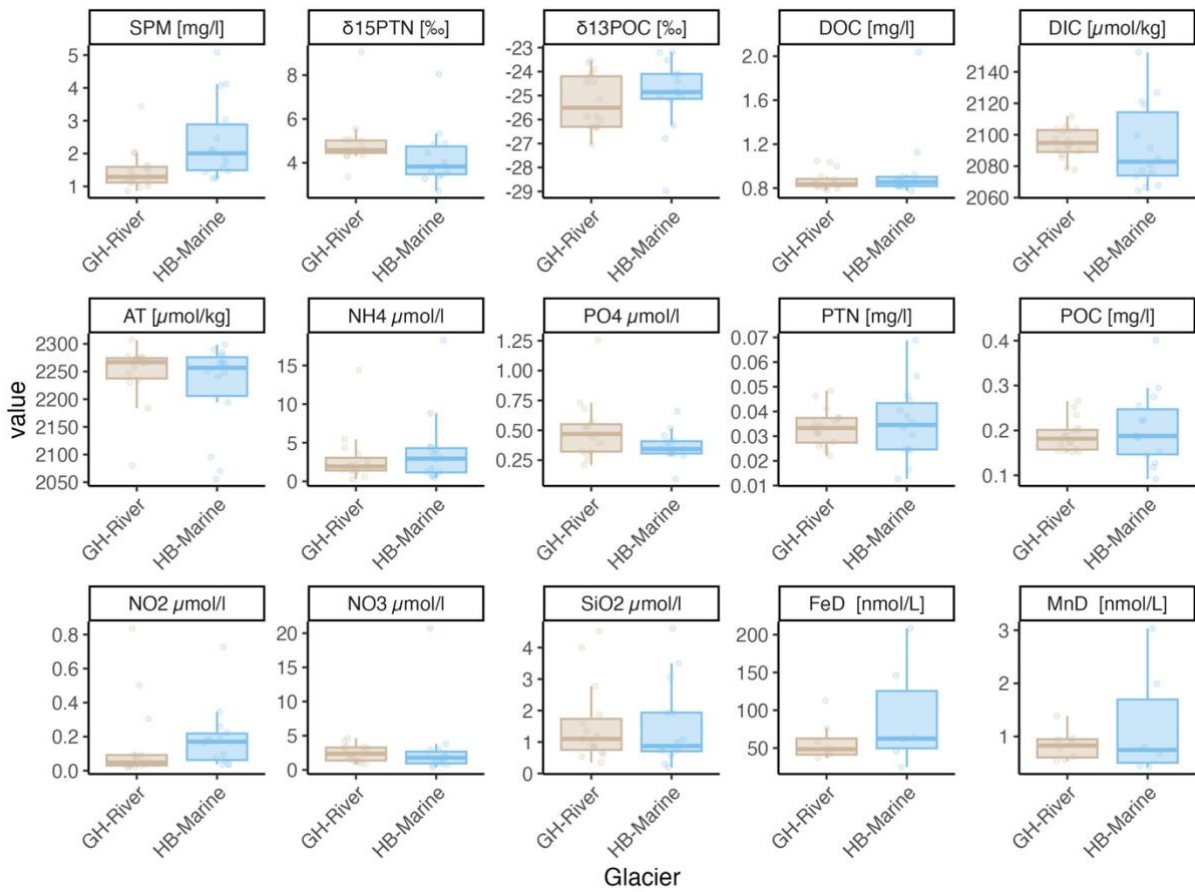

15

Fig. S3. Comparison of biogeochemical properties between Land-based (GH) and Marine-terminating (H) in the upper 50-m layer in Hornsund in May 2023.

20

25

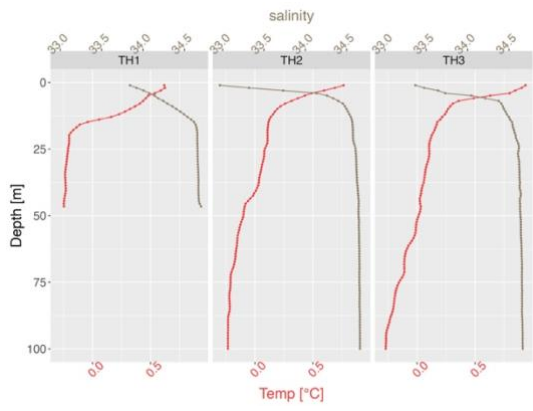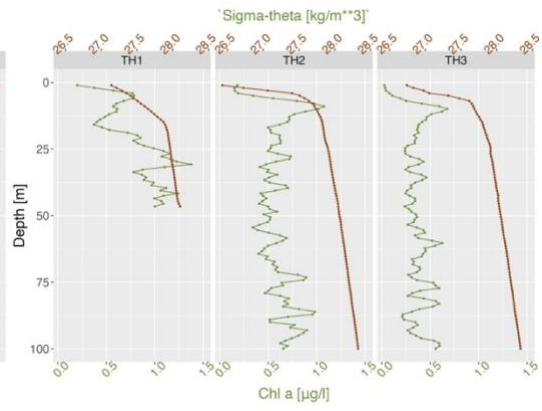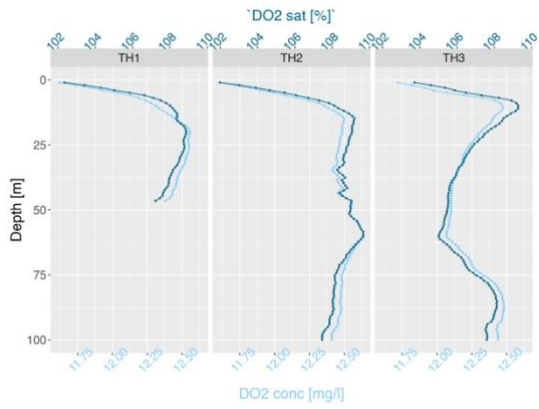

30

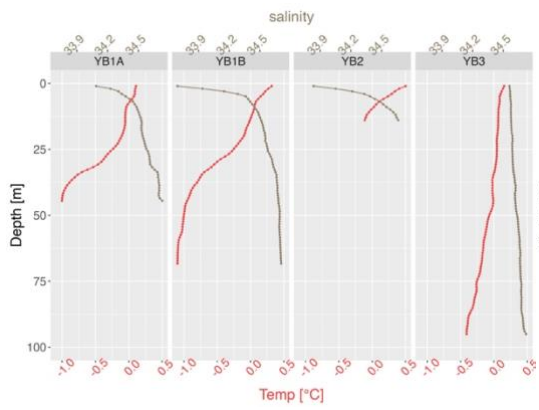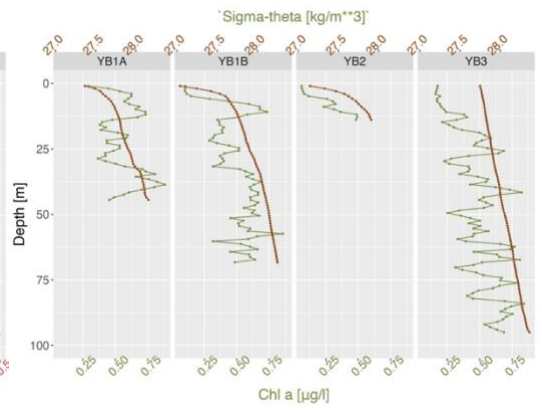

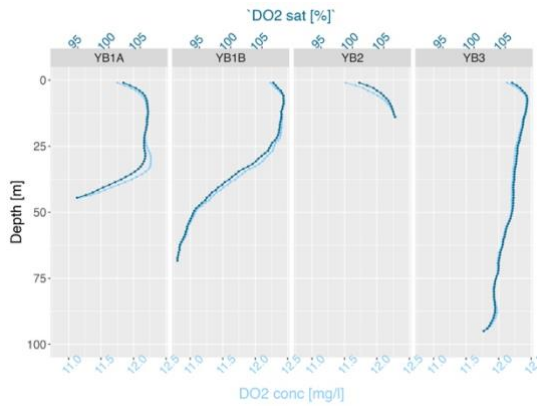

Fig. S4. Vertical profiles of temperature, salinity, density, chlorophyll concentrations, oxygen concentration & saturation, and two types of particle fluxes at stations in Tryghamna (TH) and Yberbukta (YB) in May 2023.

35

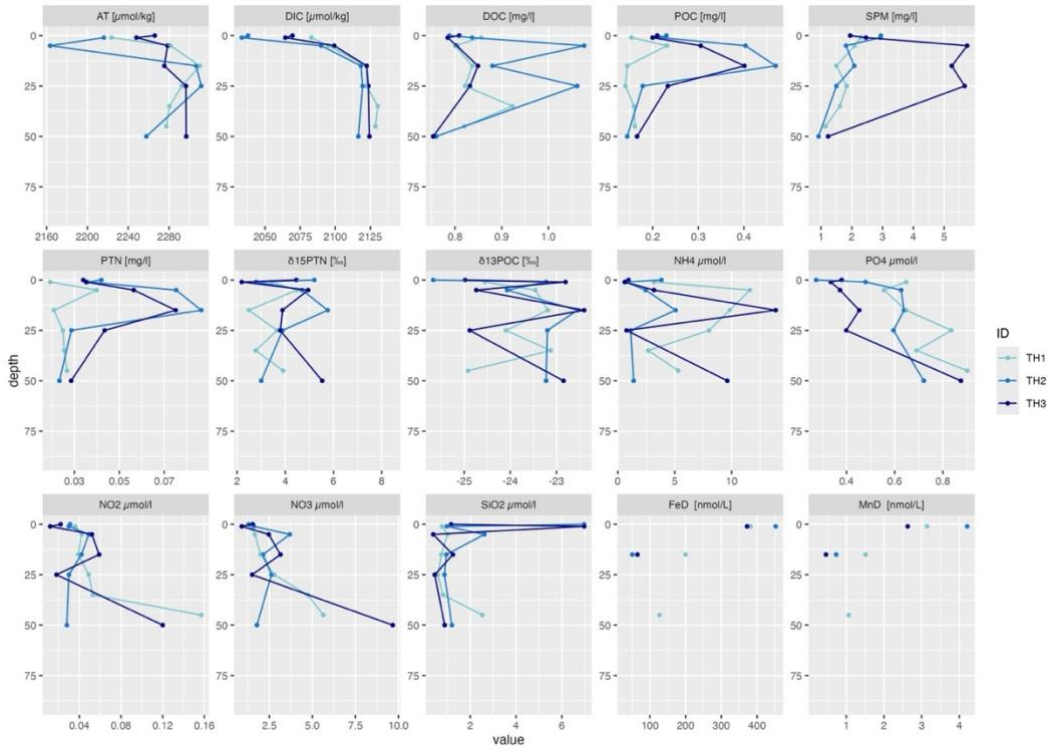

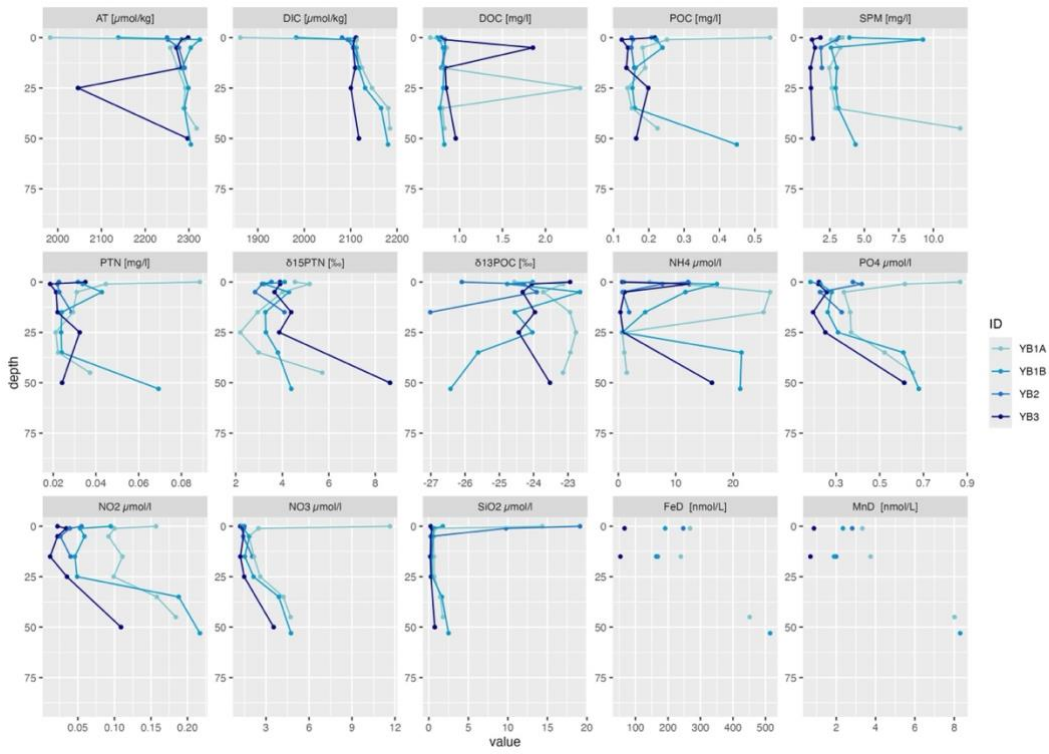

Fig. S5. Vertical profiles of biogeochemical properties in Goshamna (GH) and near Hanbreen (HB) in May 2023.

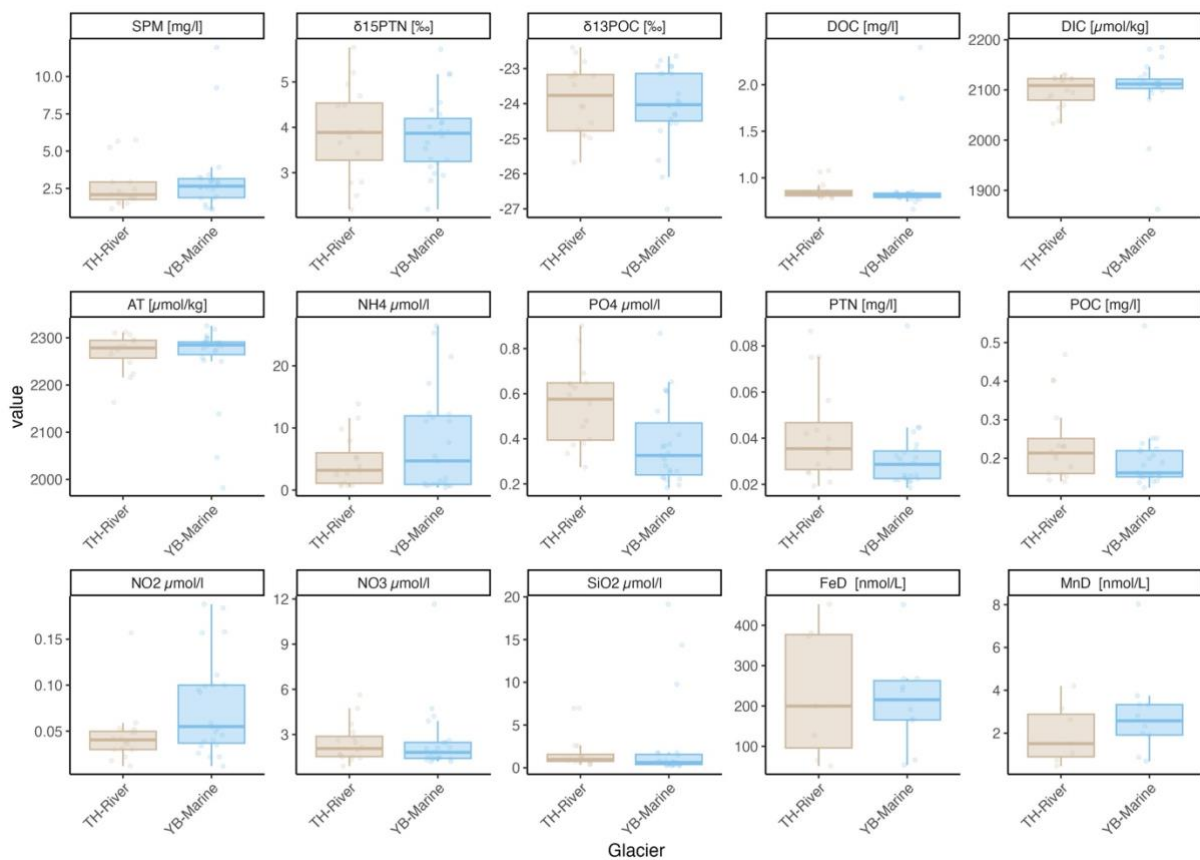

Fig. S6. Comparison of biogeochemical properties between Land-based (TH) and Marine-terminating (YB) in the upper 50-m layer in Isfjorden in May 2023.

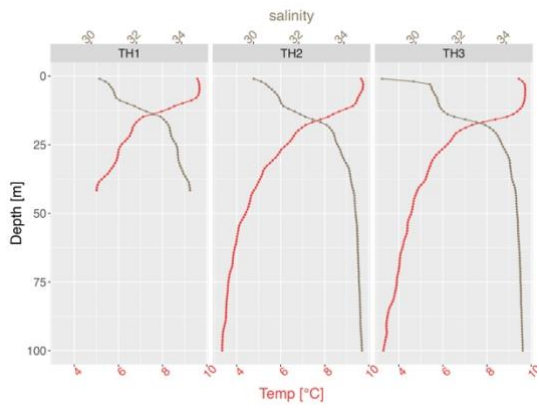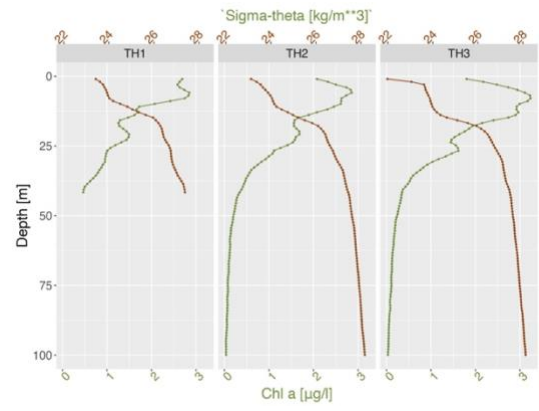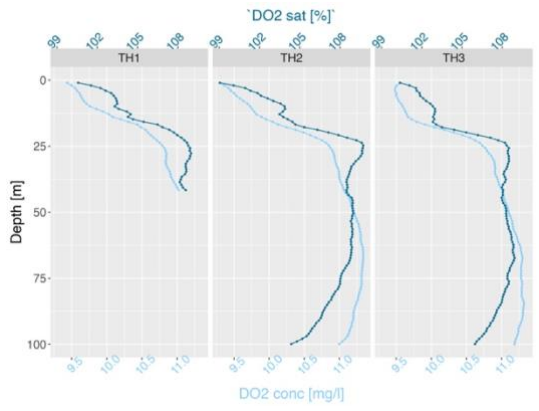

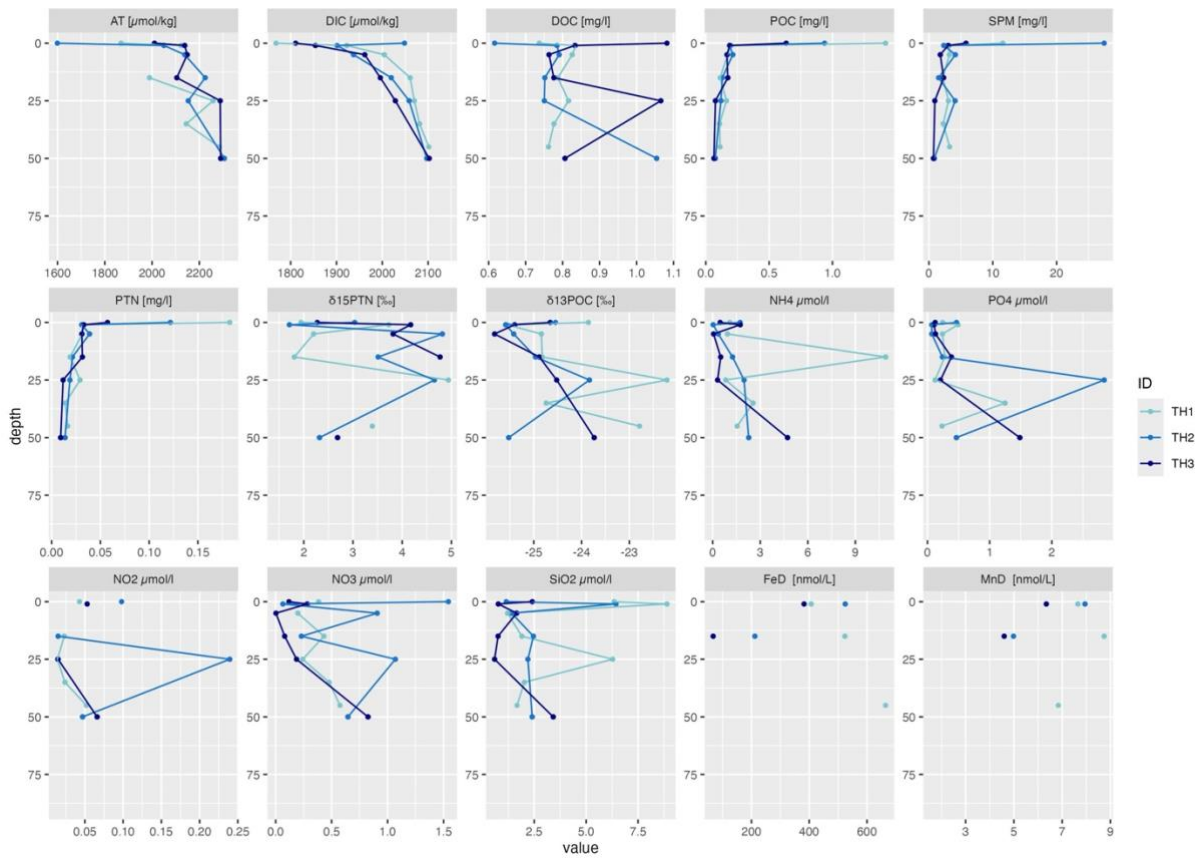

Fig. S7. Vertical profiles of temperature, salinity, density, chlorophyll concentrations, oxygen concentration & saturation, and two types of particle fluxes, as well as of biogeochemical properties at stations in Tryghamna (TH) in August 2023.

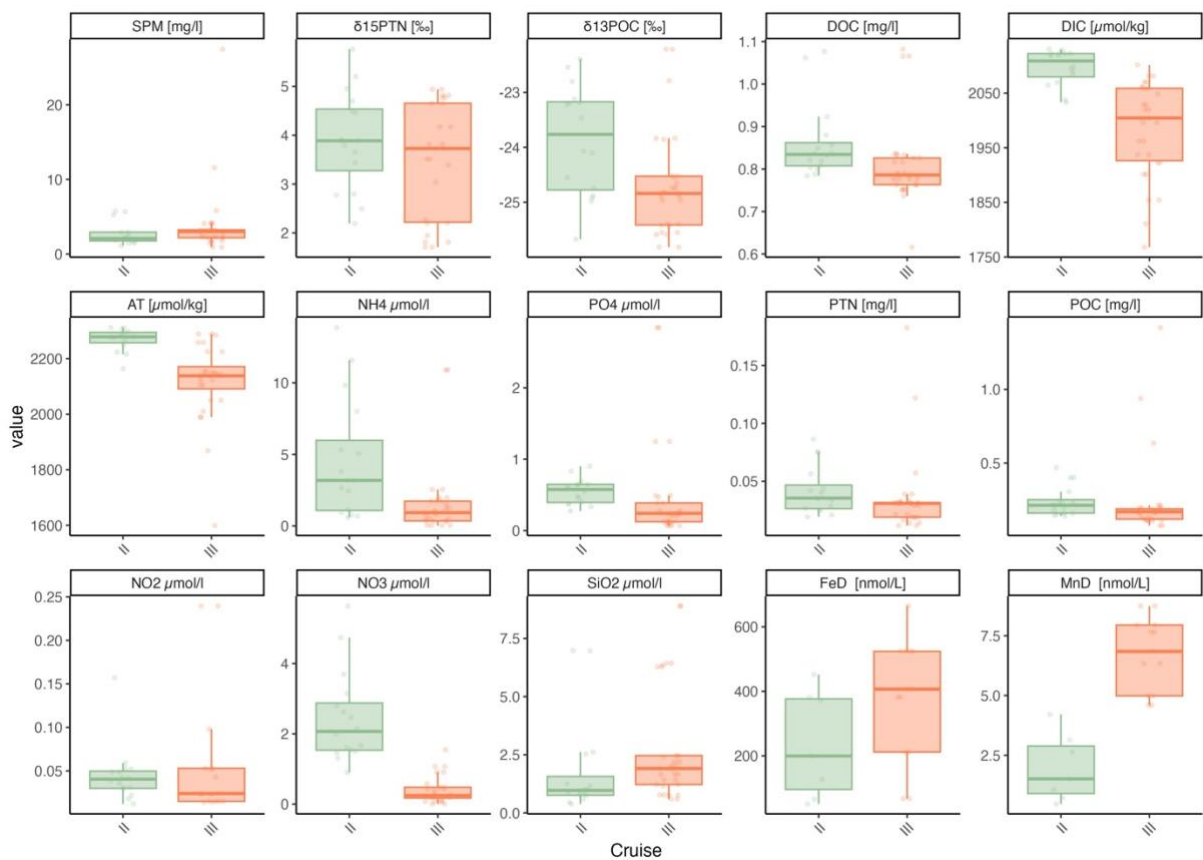

Fig. S8. Comparison of biogeochemical properties between Land-based (TH) impact of glacier in the upper 50-m layer in Isfjorden between May 2023 (II) and August 2023 (III).

55

60

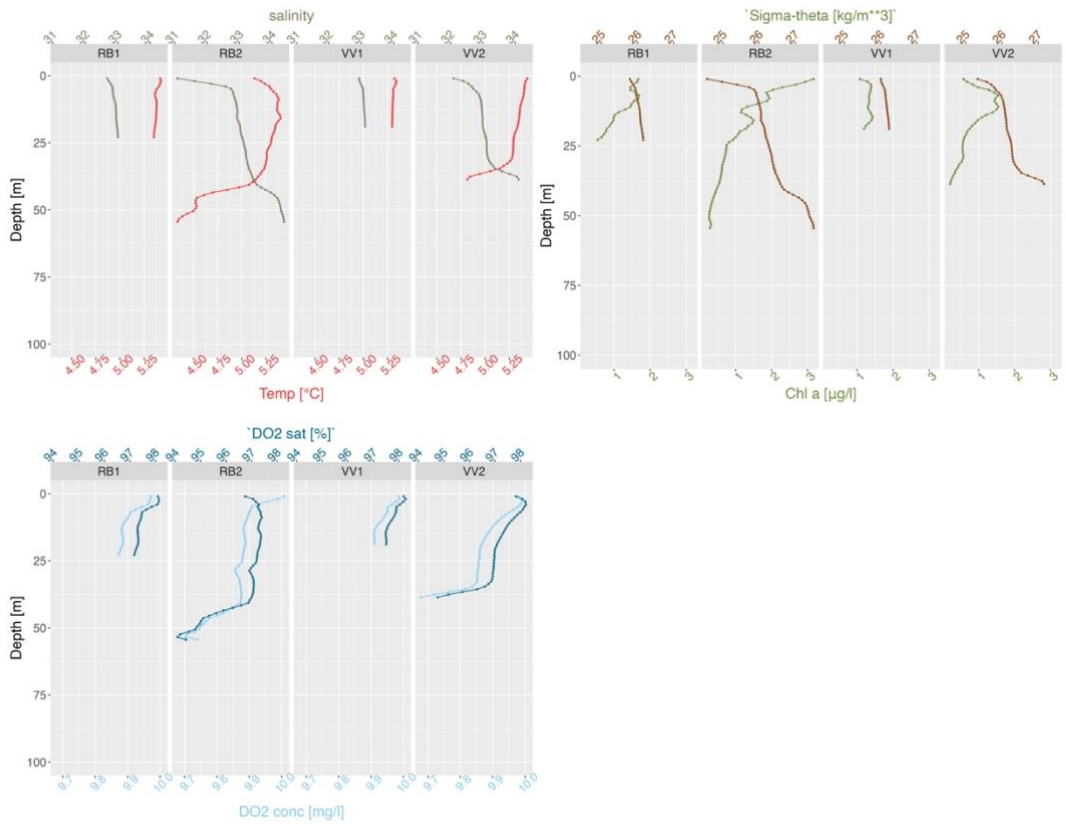

65

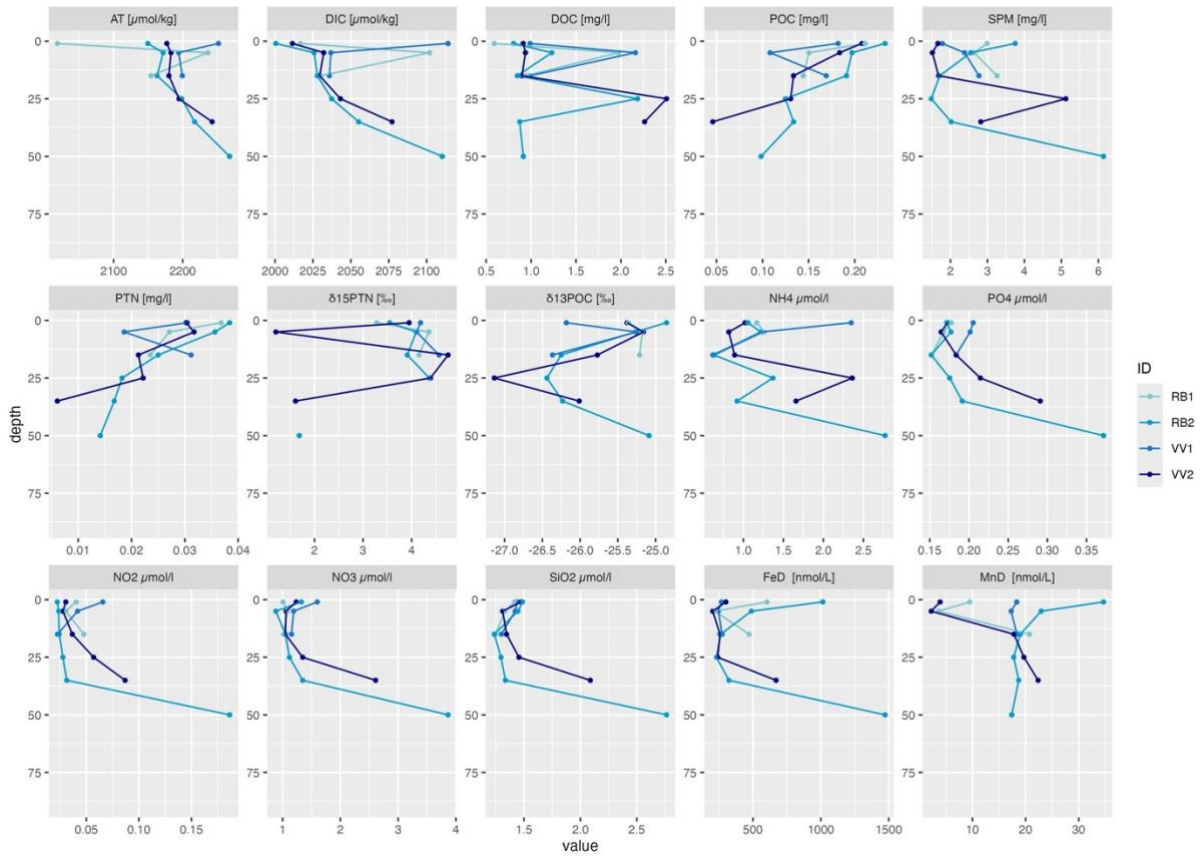

Fig. S9. Vertical profiles of temperature, salinity, density, chlorophyll concentrations, oxygen concentration & saturation, and two types of particle fluxes, as well as of biogeochemical properties at stations in Tryghamna (TH) in August.

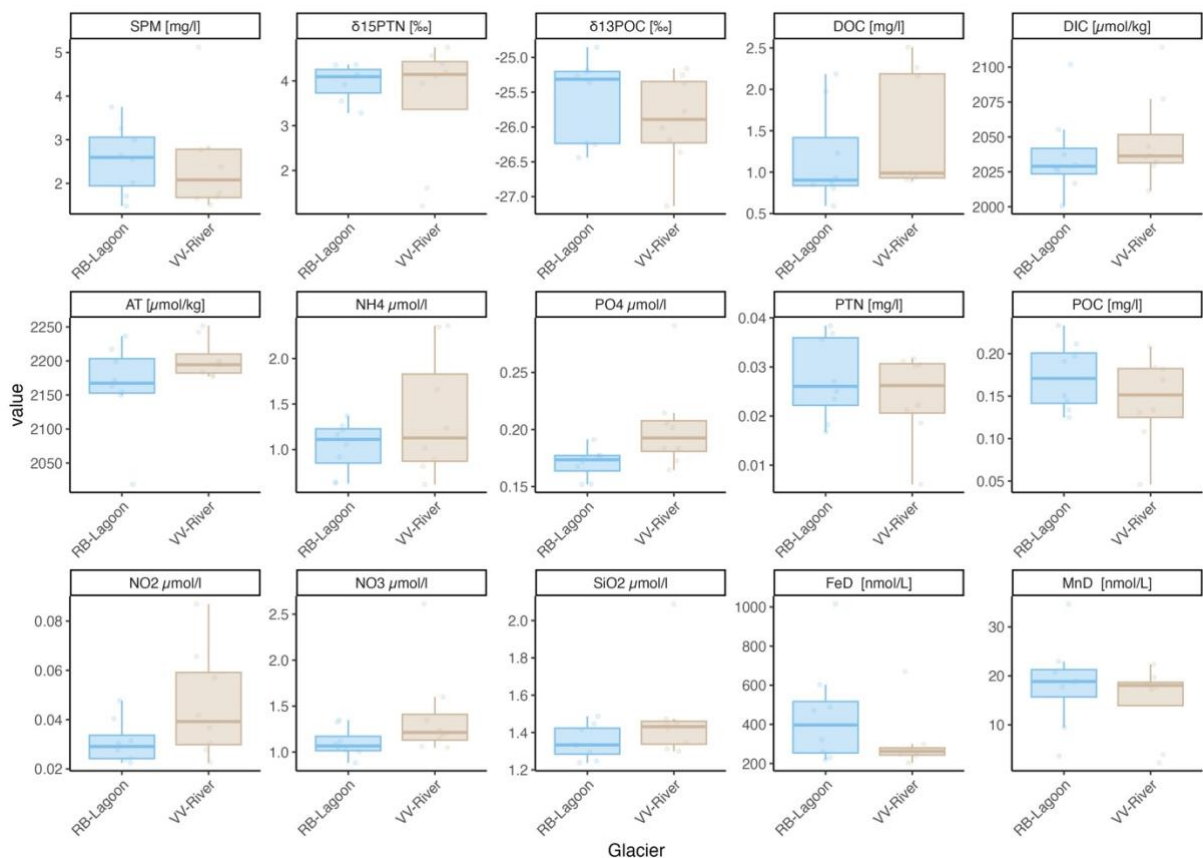

70 Fig. S10. Comparison of biogeochemical properties between Lagoon-based (RB) and Land-based (VV) glaciers in the upper 50-m layer in Recherchefjorden in August.

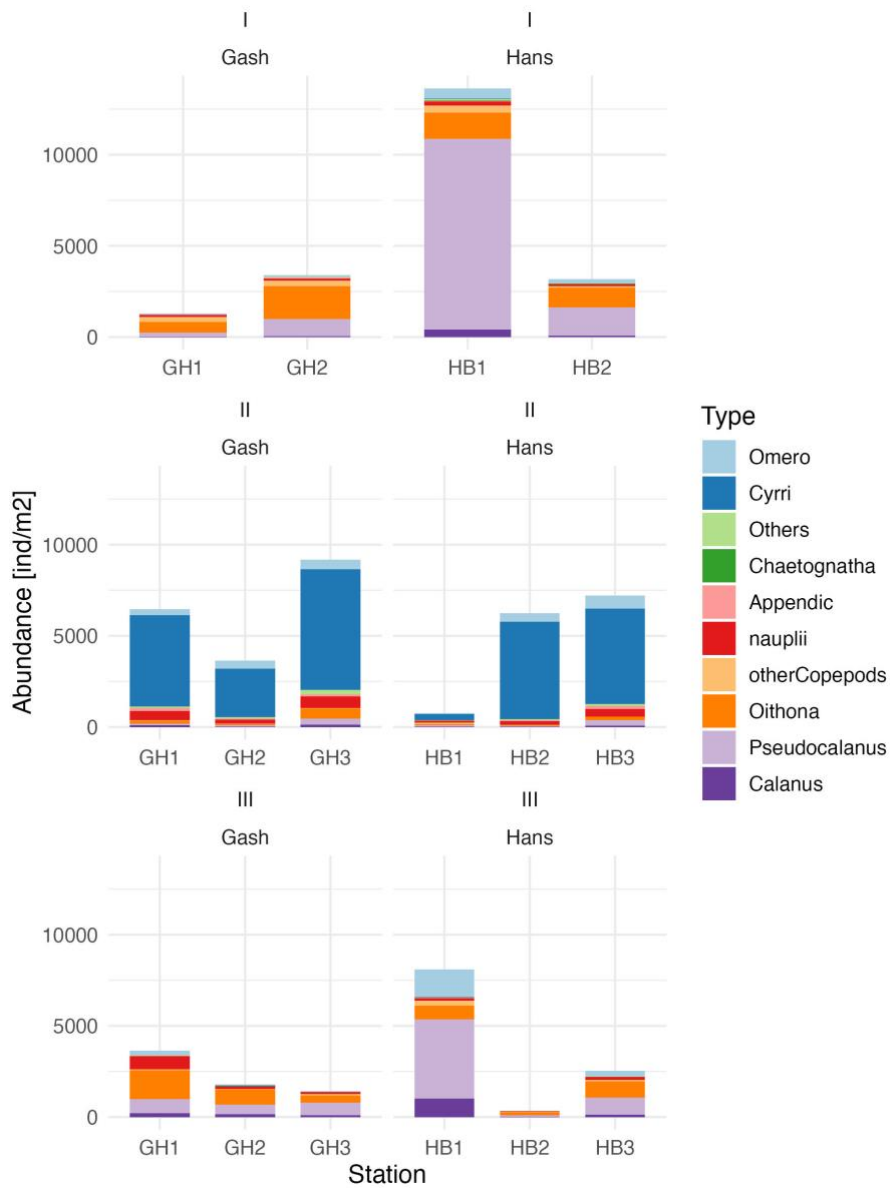

Fig. S11. Zooplankton composition across 3 cruises between Gåshamna (Land-based) and Hansbreen (Marine-terminating)
